# Supplementary material
Source: Research Square preprint supplement (doi:10.21203/rs.3.rs-9250316/v1)
Supplement: Supplementary file 1 [file 51ad91286720030c24ba783a.xlsx]

## Sheet: Sheet1
	Table S10: Concordance matrix of expenditure items (questionnaire --> EXIOBASE)
	EXOBASE Questionnaire item	Original ver.	Paddy rice	Wheat	Cereal grains nec	Vegetables, fruit, nuts	Oil seeds	Sugar cane, sugar beet	Plant-based fibers	Crops nec	Cattle	Pigs	Poultry	Meat animals nec	Animal products nec	Raw milk	Wool, silk-worm cocoons	Manure (conventional treatment)	Manure (biogas treatment)	Products of forestry, logging and related services (02)	Fish and other fishing products; services incidental of fishing (05)	Anthracite	Coking Coal	Other Bituminous Coal	Sub-Bituminous Coal	Patent Fuel	Lignite/Brown Coal	BKB/Peat Briquettes	Peat	Crude petroleum and services related to crude oil extraction, excluding surveying	Natural gas and services related to natural gas extraction, excluding surveying	Natural Gas Liquids	Other Hydrocarbons	Uranium and thorium ores (12)	Iron ores	Copper ores and concentrates	Nickel ores and concentrates	Aluminium ores and concentrates	Precious metal ores and concentrates	Lead, zinc and tin ores and concentrates	Other non-ferrous metal ores and concentrates	Stone	Sand and clay	Chemical and fertilizer minerals, salt and other mining and quarrying products n.e.c.	Products of meat cattle	Products of meat pigs	Products of meat poultry	Meat products nec	products of Vegetable oils and fats
		Integrated ver. (colored items are integrated into one)	Food														Wool, silk-worm cocoons	Manure (conventional treatment)	Manure (biogas treatment)	Products of forestry, logging and related services (02)	Food	Anthracite	Coking Coal	Other Bituminous Coal	Sub-Bituminous Coal	Patent Fuel	Lignite/Brown Coal	BKB/Peat Briquettes	Peat	Crude petroleum and services related to crude oil extraction, excluding surveying	Natural gas and services related to natural gas extraction, excluding surveying	Natural Gas Liquids	Other Hydrocarbons	Uranium and thorium ores (12)	Iron ores	Copper ores and concentrates	Nickel ores and concentrates	Aluminium ores and concentrates	Precious metal ores and concentrates	Lead, zinc and tin ores and concentrates	Other non-ferrous metal ores and concentrates	Stone	Sand and clay	Chemical and fertilizer minerals, salt and other mining and quarrying products n.e.c.	Food
	Information & communication		0														0	0	0	0	0	0	0	0	0	0	0	0	0	0	0	0	0	0	0	0	0	0	0	0	0	0	0	0	0
	Electricity		0														0	0	0	0	0	0	0	0	0	0	0	0	0	0	0	0	0	0	0	0	0	0	0	0	0	0	0	0	0
	Water supply		0														0	0	0	0	0	0	0	0	0	0	0	0	0	0	0	0	0	0	0	0	0	0	0	0	0	0	0	0	0
	Sewerage service		0														0	0	0	0	0	0	0	0	0	0	0	0	0	0	0	0	0	0	0	0	0	0	0	0	0	0	0	0	0
	Cooking fuel: Biomass (cow dung, agriculture residue, etc.)		0														0	0	0	0	0	0	0	0	0	0	0	0	0	0	0	0	0	0	0	0	0	0	0	0	0	0	0	0	0
	Cooking fuel: Fuelwood		0														0	0	0	0	0	0	0	0	0	0	0	0	0	0	0	0	0	0	0	0	0	0	0	0	0	0	0	0	0
	Cooking fuel: LPG cylinder		0														0	0	0	0	0	0	0	0	0	0	0	0	0	0	0	0	0	0	0	0	0	0	0	0	0	0	0	0	0
	Cooking fuel: Piped gas		0														0	0	0	0	0	0	0	0	0	0	0	0	0	0	0	0	0	0	0	0	0	0	0	0	0	0	0	0	0
	Food (including tobacco, pan, liquor, beverages, etc.)		1														0	0	0	0	1	0	0	0	0	0	0	0	0	0	0	0	0	0	0	0	0	0	0	0	0	0	0	0	1
	Eating outside (at restaurant, etc.)		0														0	0	0	0	0	0	0	0	0	0	0	0	0	0	0	0	0	0	0	0	0	0	0	0	0	0	0	0	0
	Petrol/ diesel for private vehicles		0														0	0	0	0	0	0	0	0	0	0	0	0	0	0	0	0	0	0	0	0	0	0	0	0	0	0	0	0	0
	Transport: Bus		0														0	0	0	0	0	0	0	0	0	0	0	0	0	0	0	0	0	0	0	0	0	0	0	0	0	0	0	0	0
	Transport: Hired vehicle (auto rickshaw, taxi, etc.)		0														0	0	0	0	0	0	0	0	0	0	0	0	0	0	0	0	0	0	0	0	0	0	0	0	0	0	0	0	0
	Transport: Metro/ railway		0														0	0	0	0	0	0	0	0	0	0	0	0	0	0	0	0	0	0	0	0	0	0	0	0	0	0	0	0	0
	Transport: Flight		0														0	0	0	0	0	0	0	0	0	0	0	0	0	0	0	0	0	0	0	0	0	0	0	0	0	0	0	0	0
	Transport: Ship		0														0	0	0	0	0	0	0	0	0	0	0	0	0	0	0	0	0	0	0	0	0	0	0	0	0	0	0	0	0
	Education		0														0	0	0	0	0	0	0	0	0	0	0	0	0	0	0	0	0	0	0	0	0	0	0	0	0	0	0	0	0
	Health and medical service		0														0	0	0	0	0	0	0	0	0	0	0	0	0	0	0	0	0	0	0	0	0	0	0	0	0	0	0	0	0
	Clothes		0														0	0	0	0	0	0	0	0	0	0	0	0	0	0	0	0	0	0	0	0	0	0	0	0	0	0	0	0	0
																																													0
[truncated: 153 more columns]
