# Supplementary material
Source: Research Square preprint supplement (doi:10.21203/rs.3.rs-9250316/v1)
Supplement: Supplementary file 1 [file c7b7e721c84602377ec0c42d.docx]

**Supplementary Methods**

Supplementary Method 1: Calculation of indirect emissions

For items purchased or procured from the market through household spending, CF can be calculated using the following formula and the input-output table (IOT), based on the amount of expenditure.

(1)

(2)

(3)

Where:

*A*: Input coefficient matrix;

*Z*: Matrix representing the transaction amounts between industries;

*x*: Total production vector;

*I*: Identity matrix;

*y*: Expenditure amount;

*S*: CO2 emission coefficient matrix;

*d*: Consumption-based environmental impact (CF)

The following adjustments are made to the expenditure amounts, taking into account the characteristics of the input-output table (IOT):

1. To eliminate the effects of inflation, the expenditure data are adjusted to the IOT reference year using the consumer price index.
2. The expenditure data are converted, along with the currency conversion, from consumer prices to basic prices by deducting transport and trade margins and tax rates.
3. The import ratio for each product is calculated based on India’s household final consumption. It is assumed that the import ratio for input products is uniform for each sector.

Supplementary Method 2: Calculation of direct emissions

Direct emissions from households arise from activities such as fuel use for cooking and gasoline consumption for private vehicles. When these fuels are consumed, direct emissions are calculated in addition to indirect emissions. First, the average fuel price for 2023—i.e., the year the survey was conducted—is obtained, and the quantity of fuel purchased is estimated from the amount paid. Direct emissions are then calculated by multiplying the emission factor for each fuel type by the amount of fuel purchased. The average fuel price in 2023 and the emission factor for each fuel type are shown in Supplementary Table S11 [1][2][3]. Since the distinction between gasoline and diesel vehicles was not made during the survey, all vehicles, both four-wheelers and two-wheelers, are assumed to use gasoline as it is the predominant fuel in the region. The emission factors used for the calculation are the global average and, therefore, may have slight variations from those used in the target areas. When fuelwood was used as fuel, neither indirect nor direct emissions were calculated, as it is considered carbon neutral.

**Supplementary Method 3: Statistical analysis**

A statistical analysis is conducted for the entire sample of 291 households for the purpose of identifying correlations among the surveyed items. Our particular focus is to examine the potential factors underlying differences in household CF associated with varying levels of infrastructure development.

To quantitatively capture vegetation loss in urban areas and the degree of concentration of built structures, such as asphalt roads, two indices are introduced: the Normalized Difference Vegetation Index (NDVI) and the Normalized Difference Built-up Index (NDBI). Both indices are calculated from satellite data based on the geographic locations of the surveyed households, according to the formulas presented below, thereby identifying vegetation activity (NDVI) and the density of built-up structures such as asphalt roads (NDBI) at each location.

NDVI is an index calculated from satellite imagery using near-infrared (NIR) and red light (RED) reflectance to measure vegetation health and density. With the NDVI value range between -1 to 1, the higher value indicates the presence of vegetation in the selected area is exorbitant.

NDBI is an index calculated from satellite imagery using shortwave infrared (SWIR) and near-infrared (NIR) reflectance to identify built-up (urban) areas. With the NDBI value range between -1 to 1, the negative value indicates the pixel area is in a non-built-up coverage area, while a positive number indicates the concentration of built-up area.

**Supplementary Tables**

**Table S1**: Characteristics of each target area

|  | Area 1 | Area 2 | Area 3 | Area 4 |
| --- | --- | --- | --- | --- |
| Availability of infrastructure services | - Grid power | - Grid power - Water supply | - Grid power - Water supply - Sewerage | - Grid power - Water supply - Sewerage - PNG |
| Major sources of drinking water | - Hand pump (communal/ individual) | - Tap water (communal/ individual) | - Tap water (communal/ individual) | - Tap water (individual) |
| Major sanitation facilities | - Pit latrine - Open defecation | - Pit latrine | - Flush toilet | - Flush toilet |
| Types of cooking fuel | - Fuelwood - LPG - Electricity | - Fuelwood - LPG - Electricity | - LPG - Electricity | - PNG - LPG - Electricity |
| Characteristics of transportation modes | - Mainly two-wheelers | - Slightly increased use of four-wheelers | - Increased use of public transport | - Mainly four-wheelers and metro |

**Table S2:** Sample sizes of each group

| Annual incomeArea | Low-income group(Upto Rs. 0.5 mil.) | Middle-income group(Rs. 0.5–1 mil.) | High-income group(More than Rs. 1 mil.) | Total |
| --- | --- | --- | --- | --- |
| 1 | 42 | 53 | 49 | 144 |
| 2 | 19 | 6 | 17 | 42 |
| 3 | 17 | 36 | 14 | 67 |
| 4 | 2 | 4 | 32 | 38 |
| Total | 80 | 99 | 112 | 291 |

**Table S3:** Per household ownership of electrical appliances (%) (n=112)

|  | Area 1 | Area 2 | Area 3 | Area 4 |
| --- | --- | --- | --- | --- |
| Fan | 98% | 100% | 100% | 97% |
| Evaporative cooler | 82% | 100% | 100% | 78% |
| Air conditioner | 12% | 41% | 93% | 91% |
| Electric water heater (geyser) | 35% | 53% | 100% | 97% |
| Refrigerator | 98% | 100% | 79% | 91% |
| Microwave oven | 2% | 18% | 57% | 31% |
| Induction heater | 45% | 71% | 93% | 81% |
| Mixer grinder | 88% | 100% | 100% | 88% |
| Washing machine | 82% | 94% | 100% | 91% |
| Vacuum cleaner | 2% | 41% | 79% | 66% |
| Electric iron | 98% | 100% | 100% | 91% |

**Table S4:** Regression analysis result between appliance use and electricity expenditure

All continuous variables were standardized before regression analysis. Multicollinearity was examined using variance inflation factors (VIFs), and all variables exhibited VIF values below 5, suggesting negligible multicollinearity.

| Household annual expenditure for electricity purchase | | | | | |
| --- | --- | --- | --- | --- | --- |
| Variable | Estimates | Std. Error | *t* value | *p* | VIF |
| Intercept  Household size  Number of rooms  Fan  Evaporative cooler  Air conditioner  Geyser  Refrigerator  Microwave oven  Induction heater  Mixer grinder  Washing machine  Vacuum cleaner  Electric iron | 0.0226  0.0331  0.1362  0.0096  -0.0118  0.3035  0.2000  0.0676  0.0699  0.1336  0.0135  0.1740  0.0044  0.0549 | 0.0378  0.0415  0.0531  0.0406  0.0578  0.0607  0.0635  0.0549  0.0441  0.0522  0.0571  0.0643  0.0522  0.0541 | -0.60  0.80  2.56  0.24  -0.21  5.00  3.15  1.23  1.58  2.56  0.24  2.70  0.08  1.01 | 0.550  0.425  0.011 *  0.814  0.8380  1.11e-06 **  0.002 **  0.219  0.115  0.011 *  0.814  0.007 **  0.933  0.312 | 1.209  2.016  1.063  2.471  2.774  2.874  2.222  1.640  1.919  2.439  3.010  2.096  2.243 |
| R2=0.7085 | | | | | |

Note: Double asterisks (**) and single asterisks (*) indicate significance with a 99% and 95% confidence level, respectively.

**Table S5:** Logistic regression results for determinants of air conditioner use

NDVI values were calculated as the average value within a 500m circular buffer around each household location to represent neighborhood-level vegetation conditions. Multicollinearity was examined using variance inflation factors (VIFs), and all variables exhibited VIF values below 5, suggesting negligible multicollinearity.

| Use of air conditioners | | | | | |
| --- | --- | --- | --- | --- | --- |
| Variable | Estimates | Std. Error | *t* value | *p* | VIF |
| Intercept  NDVI  Per-capita total expenditure | -2.824  -14.04  3.969e-04 | 1.261  8.731  6.827e-05 | -2.239  -1.608  5.814 | 0.0252*  0.1078  6.12e-09** | 1.023  1.023 |

Note: Double asterisks (**) and single asterisks (*) indicate significance with a 99% and 95% confidence level, respectively.

**Table S6:** Logistic regression results for determinants of fuelwood use

NDVI values were calculated as the average value within a 500 m circular buffer around each household location to represent neighborhood-level vegetation conditions. Multicollinearity was examined using variance inflation factors (VIFs), and all variables exhibited VIF values below 5, suggesting negligible multicollinearity.

| Use of fuelwood for water heating (bathing) | | | | | |
| --- | --- | --- | --- | --- | --- |
| Variable | Estimates | Std. Error | *t* value | *p* | VIF |
| Intercept  Individual tap water supply  NDVI  Per-capita total expenditure | -2.184  -0.2118  29.35  -2.869e-04 | 0.9165  0.4978  6.796  7.061e-05 | -2.384  -0.425  4.319  -4.064 | 0.0171*  0.6705  1.57e-05**  4.83e-05** | 1.242  1.088  1.337 |
| Use of fuelwood for cooking | | | | | |
| Variable | Estimates | Std. Error | *t* value | *p* | VIF |
| Intercept  NDVI  Per-capita total expenditure | -13.68  93.26  -1.909e-04 | 2.876  19.67  6.103e-05 | -4.755  4.742  -3.127 | 1.98e-06**  2.12e-06**  1.76e-03** | 1.254  1.254 |

Note: Double asterisks (**) and single asterisks (*) indicate significance with a 99% and 95% confidence level, respectively.

**Table S7:** Regression analysis results for determinants of gasoline expenditure (n=291)

All continuous variables were standardized before regression analysis. Multicollinearity was examined using variance inflation factors (VIFs), and all variables exhibited VIF values below 5, suggesting negligible multicollinearity.

| Household expenditure for gasoline purchase | | | | | |
| --- | --- | --- | --- | --- | --- |
| Variable | Estimates | Std. Error | *t* value | *p* | VIF |
| Intercept  Number of two-wheelers owned  Number of four-wheelers owned  Per-capita total expenditure | 9.762e-17  0.3935  0.3404  0.2747 | 0.0377  0.0405  0.0449  0.0441 | 1.118  9.716  7.587  6.232 | 0.264  <2e-16**  4.61e-13**  1.63e-09** | 1.148  1.409  1.359 |
| R2＝0.5899 | | | | | |

**Table S8:** Regression analysis results for determinants of private vehicle ownership

All continuous variables were standardized before regression analysis. NDBI values were calculated as the average value within a 500m circular buffer around each household location to represent neighborhood-level built-up conditions. Multicollinearity was examined using variance inflation factors (VIFs), and all variables exhibited VIF values below 5, suggesting negligible multicollinearity.

| Number of private vehicles owned | | | | | |
| --- | --- | --- | --- | --- | --- |
| Variable | Estimates | Std. Error | *t* value | *p* | VIF |
| Intercept  NDBI  Per-capita total expenditure | -0.0833  0.2138  0.3772 | 0.0632  0.0641  0.0666 | 1.318  3.337  5.660 | 0.1892  0.00105**  6.73e-08** | 1.023  1.023 |
| R2＝0.236 | | | | | |

Note: Double asterisks (**) and single asterisks (*) indicate significance with a 99% and 95% confidence level, respectively.

**Table S9:** Main survey items

| Items | Collected data |
| --- | --- |
| Demographic data | family size; location; income level; etc. |
| Infrastructure availability | grid power; water supply; sewerage; PNG; road network |
| Expenditures | expenditures on food; housing (electricity, water and sanitation, cooking fuel, etc.); transport; and other services (education, health, clothing, etc.) |
| Energy use | Ownership of personal vehicles, electric appliances, etc. |
| Travel mode | Transportation measures for commuting, going shopping, etc. |

**Table S11:** Data used for calculating direct emissions of CO2

| Fuel type | Average retail price in 2023 | Emission factor |
| --- | --- | --- |
| Gasoline | 96.72 (INR/L) | 2.27 (kg-CO2/L) |
| LPG (Liquefied Petroleum Gas) | 1048.8 (INR/cylinder) | 42.3 (kg-CO2/cylinder) |
| PNG (Piped Natural Gas) | 57.43 (INR/m3) | 1.885 (kg-CO2/m3) |

*Note:* The retail prices of Gasoline and LPG are retrieved from the PPAC website. The retail prices of PNG are retrieved from the GGL website. The emission factors are retrieved from the WRI database.

**Supplementary Figures**

**Fig. S1: Per-capita annual expenditure (n=291)**

**Fig. S2: Per-capita annual expenditure of the high-income households (n=112)**

# References

[1] Petroleum Planning and Analysis Cell (PPAC), Ministry of Petroleum & Natural Gas, Government of India. 2024. “Retail Prices of Gasoline and LPG in 2023.” Accessed January 27, 2024. https://ppac.gov.in/all-imp-news.

[2] Green Gas Limited (GGL), India. 2024. “PNG Retail Price in Lucknow.” Accessed January 27, 2024. https://gglengage.com/FrontPage.aspx?pid=7.

[3] World Resources Institute (WRI). 2017. “WRI GHG Emission Factors Compilation.” Emission Factors from Cross Sector Tools March 2017. Accessed January 27, 2024. https://ghgprotocol.org/sites/default/files/Emission_Factors_from_Cross_Sector_Tools_March_2017.xlsx.
